# Supplementary material for: Nonmetallic Active Sites on Nickel Phosphide in Oxygen Evolution Reaction
Source: MDPI journal article supplement (doi:10.3390/nano12071130), 2022-03-29
Supplement: s1 [file s1]

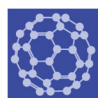

# Nonmetallic Active Sites on Nickel Phosphide in Oxygen Evolution Reaction

Pengfei Zhang <sup>†</sup>, Hongmei Qiu <sup>†</sup>, Huicong Li, Jiangang He, Yingying Xu <sup>\*</sup> and Rongming Wang <sup>\*</sup>

Beijing Advanced Innovation Center for Materials Genome Engineering, Beijing Key Laboratory for Magneto-Photoelectrical Composite and Interface Science, School of Mathematics and Physics, University of Science and Technology Beijing, Beijing 100083, China; zpf3516@163.com (P.Z.); hmqiu@ustb.edu.cn (H.Q.); 18166758766@163.com (H.L.); jghe2021@ustb.edu.cn (J.H.)

<sup>\*</sup> Correspondence: xuyingying@ustb.edu.cn (Y.X.); rmwang@ustb.edu.cn (R.W.)

<sup>†</sup> These authors contributed equally to this work.

## The details of OER calculations[1]

The relationship between Gibbs free energy ( $\mu$  or  $G$ ) and DFT energy ( $E_{\text{DFT}}$ ) are constructed based on the following thermodynamic approximations. In all equations,  $\mu_{\text{H}^+}$ ,  $\mu_{\text{e}^-}$ ,  $\mu_{\text{H}_2}$ ,  $\mu_{\text{O}_2}$  and  $\mu_{\text{H}_2\text{O}}$  denote chemical potentials of proton, electron, hydrogen molecule, oxygen molecule and water molecule, respectively. The superscript <sup>0</sup> is standard conditions of pH = 0, P=1bar and T = 298.15 K.  $E_{\text{DFT}}$  is the energy obtained from DFT calculations.

First of all, hydrogen electrode is assumed to be in equilibrium:

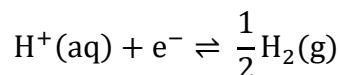

Thus

$$\mu_{\text{H}^+}^0 + \mu_{\text{e}^-}^0 = \frac{1}{2}\mu_{\text{H}_2(\text{g})}^0 \quad (\text{S1})$$

Secondly, the experimental free energy increase for the following reaction is 2.46 eV:

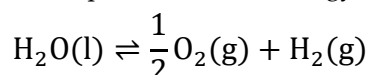

So,

$$\mu_{\text{H}_2(\text{g})}^0 + \frac{1}{2}\mu_{\text{O}_2(\text{g})}^0 - \mu_{\text{H}_2\text{O}(\text{l})}^0 = 2.46 \text{ [eV]} \quad (\text{S2})$$

By definition,

$$G = H - TS \quad (\text{S3})$$

where  $G$  is Gibbs free energy which can also be represented by chemical potential  $\mu$ ,  $H$  is the enthalpy of the system which equals to  $E_{\text{DFT}}$  corrected by the zero-point energy (ZPE).  $S$  is the entropy of the system. The ZPE and entropy at 298 K.

As a result,

$$\mu = E_{\text{DFT}} + \text{ZPE} - TS \quad (\text{S4})$$

For  $\text{H}_2$  molecule at standard conditions,

$$\mu_{\text{H}^+}^0 + \mu_{\text{e}^-}^0 = \frac{1}{2}\mu_{\text{H}_2(\text{g})}^0 = \frac{1}{2}(E_{\text{DFT}}^{\text{H}_2} + \text{ZPE}_{\text{H}_2(\text{g})} - TS_{\text{H}_2(\text{g})}^0) \quad (\text{S5})$$

For  $\text{H}_2\text{O}$  molecule in liquid phase,

$$\mu_{\text{H}_2\text{O}(\text{l})}^0 \approx \mu_{\text{H}_2\text{O}(\text{g})} = E_{\text{DFT}}^{\text{H}_2\text{O}(\text{g})} + \text{ZPE}_{\text{H}_2\text{O}(\text{g})} - TS_{\text{H}_2\text{O}}^0(0.035 \text{ bar}) \quad (\text{S6})$$

In this scheme, the OER is assumed to consist of four elementary reaction steps (\* denotes a surface site and \*X represents an adsorbed X intermediate on the surface). Equations (1) to (4) are also employed for deriving  $\Delta G_1^0$  to  $\Delta G_4^0$ .

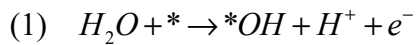

$$\Delta G_1^0 = \mu_{HO*}^0 + \mu_{H^+}^0 + \mu_{e^-}^0 - \mu_*^0 - \mu_{H_2O(l)}^0 - eU$$

$$\mu_{HO*}^0 = E_{DFT}^{*OH} + ZPE_{*OH} - TS_{*OH}^0$$

$$\mu_*^0 = E_{DFT}^*$$

$$\begin{aligned} \Delta G_1^0 &= E_{DFT}^{*OH} - E_{DFT}^* + \frac{1}{2} E_{DFT}^{H_2(g)} - E_{DFT}^{H_2O(l)} + ZPE_{*OH} + \frac{1}{2} ZPE_{H_2(g)} - ZPE_{H_2O(l)} - TS_{*OH}^0 - \frac{1}{2} TS_{H_2(g)}^0 \\ &\quad + TS_{H_2O(l)}^0 = E_{DFT}^{*OH} + \frac{1}{2} E_{DFT}^{H_2(g)} - E_{DFT}^* - E_{DFT}^{H_2O(l)} + (\Delta ZPE - T \Delta S)_1 \end{aligned}$$

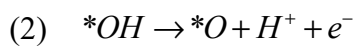

$$\Delta G_2^0 = \mu_{O*}^0 + \mu_{H^+}^0 + \mu_{e^-}^0 - \mu_{HO*}^0 - eU$$

$$\mu_{O*}^0 = E_{DFT}^{O*} + ZPE_{O*} - TS_{O*}^0$$

$$\mu_{*OH}^0 = E_{DFT}^{*OH} + ZPE_{*OH} - TS_{*OH}^0$$

$$\begin{aligned} \Delta G_2^0 &= E_{DFT}^{O*} - E_{DFT}^{*OH} + \frac{1}{2} E_{DFT}^{H_2(g)} + ZPE_{O*} - ZPE_{*OH} + \frac{1}{2} ZPE_{H_2(g)} - TS_{O*}^0 + TS_{*OH}^0 - \frac{1}{2} TS_{H_2(g)}^0 \\ &= E_{DFT}^{O*} + \frac{1}{2} E_{DFT}^{H_2(g)} - E_{DFT}^{*OH} + (\Delta ZPE - T \Delta S)_2 \end{aligned}$$

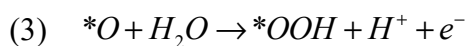

$$\Delta G_3^0 = \mu_{*OOH}^0 + \mu_{H^+}^0 + \mu_{e^-}^0 - \mu_{O*}^0 - \mu_{H_2O(l)}^0 - eU$$

$$\mu_{*OOH}^0 = E_{DFT}^{*OOH} + ZPE_{*OOH} - TS_{*OOH}^0$$

$$\mu_{O*}^0 = E_{DFT}^{O*} + ZPE_{O*} - TS_{O*}^0$$

$$\begin{aligned} \Delta G_3^0 &= E_{DFT}^{*OOH} - E_{DFT}^{O*} + \frac{1}{2} E_{DFT}^{H_2(g)} - E_{DFT}^{H_2O(l)} + ZPE_{*OOH} - ZPE_{O*} + \frac{1}{2} ZPE_{H_2(g)} - ZPE_{H_2O(l)} - TS_{*OOH}^0 \\ &\quad + TS_{O*}^0 - \frac{1}{2} TS_{H_2(g)}^0 + TS_{H_2O(l)}^0 = E_{DFT}^{*OOH} + \frac{1}{2} E_{DFT}^{H_2(g)} - E_{DFT}^{O*} - E_{DFT}^{H_2O(l)} + (\Delta ZPE - T \Delta S)_3 \end{aligned}$$

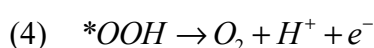

$$\Delta G_4^0 = \mu_{O_2(g)}^0 + \mu_*^0 + \mu_{H^+}^0 + \mu_{e^-}^0 - \mu_{*OOH}^0 - eU$$

$$\mu_{O_2}^0 = 4.92 \text{ [eV]} + 2\mu_{H_2O(l)}^0 - 2\mu_{H_2(g)}^0$$

$$\mu_{*OOH}^0 = E_{DFT}^{*OOH} + ZPE_{*OOH} - TS_{*OOH}^0$$

$$\begin{aligned} \Delta G_4^0 = & E_{DFT}^* - E_{DFT}^{*OOH} + 2E_{DFT}^{H_2O(l)} - \frac{3}{2}E_{DFT}^{H_2(g)} - ZPE_{*OOH} + 2ZPE_{H_2O(l)} - \frac{3}{2}ZPE_{H_2(g)} + TS_{*OOH}^0 - 2TS_{H_2O}^0 \\ & + \frac{3}{2}TS_{H_2(g)}^0 + 4.92 = E_{DFT}^* + 2E_{DFT}^{H_2O(l)} - \frac{3}{2}E_{DFT}^{H_2(g)} - E_{DFT}^{*OOH} + (\Delta ZPE - T \Delta S)_4 \end{aligned}$$

in which  $E_{DFT}^*$ ,  $E_{DFT}^{*OH}$ ,  $E_{DFT}^{*O}$  and  $E_{DFT}^{*OOH}$  are the calculated DFT energies of the clean surface and surfaces with adsorbed  $*OH$ ,  $*O$ , and  $*OOH$ , respectively.  $E_{DFT}^{H_2O(l)}$  and  $\frac{3}{2}E_{DFT}^{H_2(g)}$  are the calculated energies for the isolated gaseous molecules  $H_2O$ , and  $H_2$ , respectively.  $\Delta E_{ZPE}$  and  $\Delta S$  are the zero-point energy and the entropy correction values, respectively [2].

### Calculation method of surface energy

The surface energy is calculated by using the following equations[3]:

$$E_{surf} = \frac{1}{2A} (E_{slab} - n_{Ni} (E_{bulk-Ni} + \Delta\mu_{Ni}) - n_P (E_{bulk-P} + \Delta\mu_P))$$

$$E_{f, Ni_2P_5} = 12\Delta\mu_{Ni} + 5\Delta\mu_P$$

$$E_{surf} = \frac{1}{2A} \left( E_{slab} - n_{Ni} E_{Ni \text{ bulk}} - n_P E_{P \text{ bulk}} - \frac{E_{f, Ni_2P_5}}{12} n_{Ni} + \Delta\mu_P \left( \frac{5n_{Ni}}{12} - n_P \right) \right)$$

Where  $E_{slab}$  is the total energy of the surface model,  $E_{Ni \text{ bulk}}$  and  $E_{P \text{ bulk}}$  are the total energy per atom of the metal Ni and black P,  $E_{f, Ni_2P_5}$  is the formation energy of  $Ni_2P_5$ ,  $n_{Ni}$  and  $n_P$  are the amount of Ni and P atoms in the surface model, respectively,  $\Delta\mu_P$  is the chemical potential of P, and A is the surface area of the surface model.

For all surface models, a 15 Å vacuum layer was used for surface isolation to prevent interactions between adjacent surfaces. The top and bottom surface layers are relaxed and the middle 2 to 3 layers of atoms are fixed to simulate the bulk structure.

## Supplementary Figures and Tables

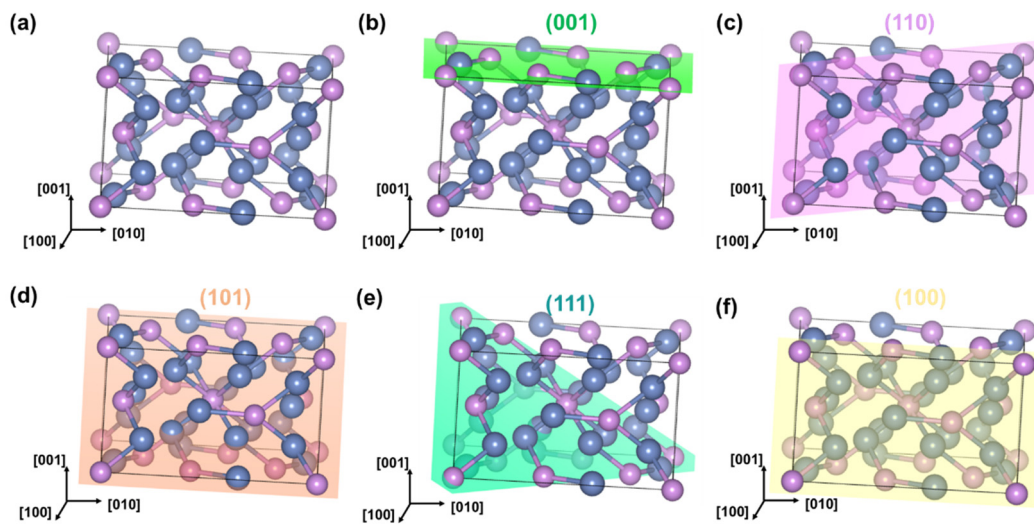

**Figure S1.** (a)  $\text{Ni}_{12}\text{P}_5$  unit cell. (b)–(f) five lattice planes include (001), (110), (101), (111) and (100), presented by green, purple, orange, cyan and yellow, respectively.

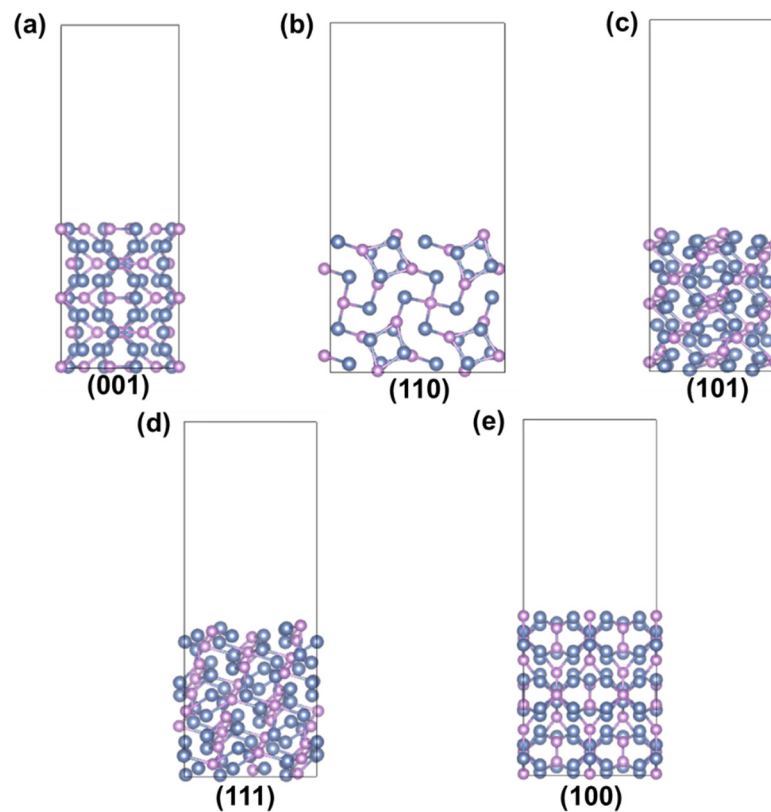

**Figure S2.** The terminated positions on different surfaces before optimization. (a) (001); (b) (110); (c) (101); (d) (111); (e) (100). Violet spheres stand for P atoms and blue spheres stand for Ni atoms.

Table S1. k-points setting for different structures.

| Surface                               | k-points | Surface                               | k-points |
|---------------------------------------|----------|---------------------------------------|----------|
| Ni <sub>2</sub> P (001)               | 3×3×1    | Ni <sub>2</sub> P (111)               | 3×4×1    |
| Ni <sub>12</sub> P <sub>5</sub> (001) | 4×4×1    | Ni <sub>12</sub> P <sub>5</sub> (111) | 5×4×1    |
| Ni <sub>5</sub> P <sub>2</sub> (001)  | 3×3×1    | Ni <sub>5</sub> P <sub>2</sub> (111)  | 3×3×1    |
| Ni <sub>3</sub> P (001)               | 4×4×1    | Ni <sub>3</sub> P (111)               | 3×4×1    |

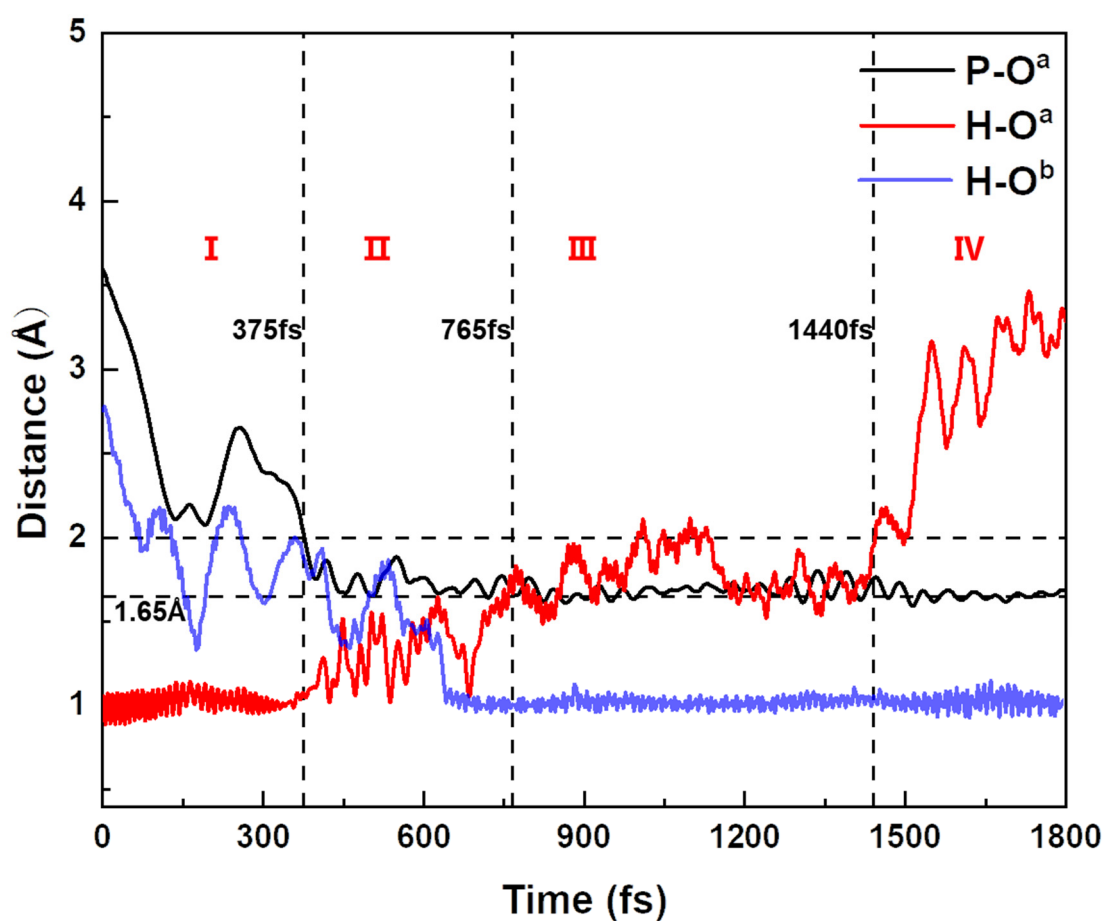

**Figure S3.** The time evolution of the key bond distances during the AIMD simulation. The black line is the bond distance between the P-O<sup>a</sup>. The red line is the bond distance between the H-O<sup>a</sup>. The blue line is the bond distance between the H-O<sup>b</sup>. H is the dissociated H ion, O<sup>a</sup> is the O atom in \*OH; O<sup>b</sup> is the O atom in another H<sub>2</sub>O, and forms O<sup>b</sup>-H...O<sup>a</sup> with H.

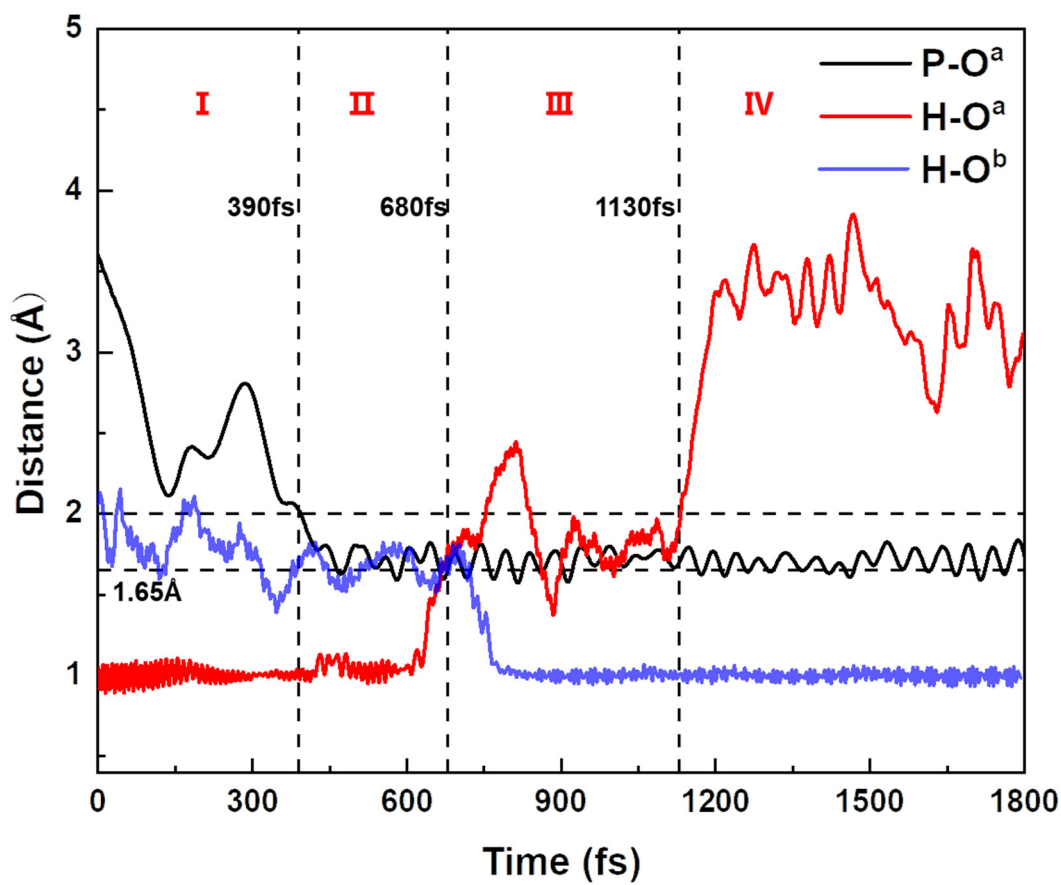

**Figure S4.** The time evolution of the key bond distances during the AIMD simulation. The black line is the bond distance between the P-O<sup>a</sup>. The red line is the bond distance between the H-O<sup>a</sup>. The blue line is the bond distance between the H-O<sup>b</sup>. H is the dissociated H ion, O<sup>a</sup> is the O atom in \*OH; O<sup>b</sup> is the O atom in another H<sub>2</sub>O, and forms O<sup>b</sup>-H...O<sup>a</sup> with H.

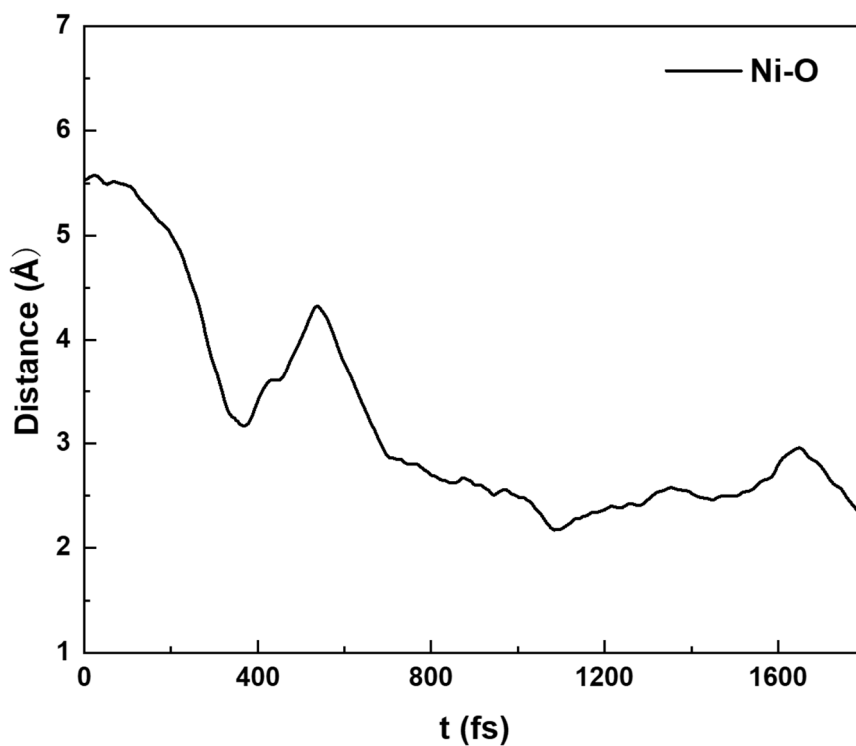

**Figure S5.** The time evolution of Ni-O distances during the AIMD simulation.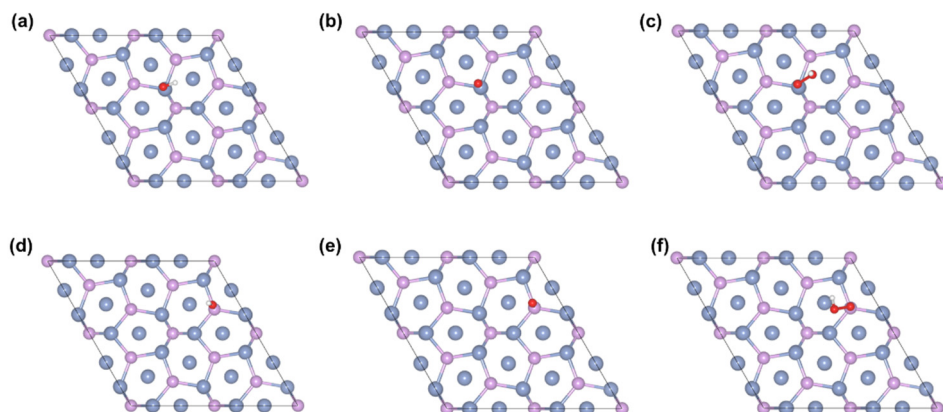**Figure S6.** Geometric configuration of (a) Ni\*OH, (b) Ni\*O, (c) Ni\*OOH, (d) P\*OH, (e) P\*O and (f) P\*OOH adsorption on the Ni<sub>2</sub>P (001) surface.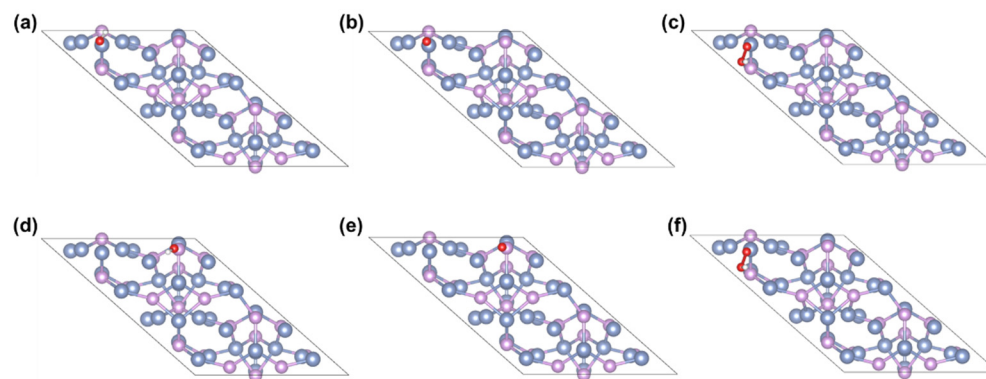**Figure S7** Geometric configuration of (a) Ni\*OH, (b) Ni\*O, (c) Ni\*OOH, (d) P\*OH, (e) P\*O and (f) P\*OOH adsorption on the Ni<sub>2</sub>P (111) surface.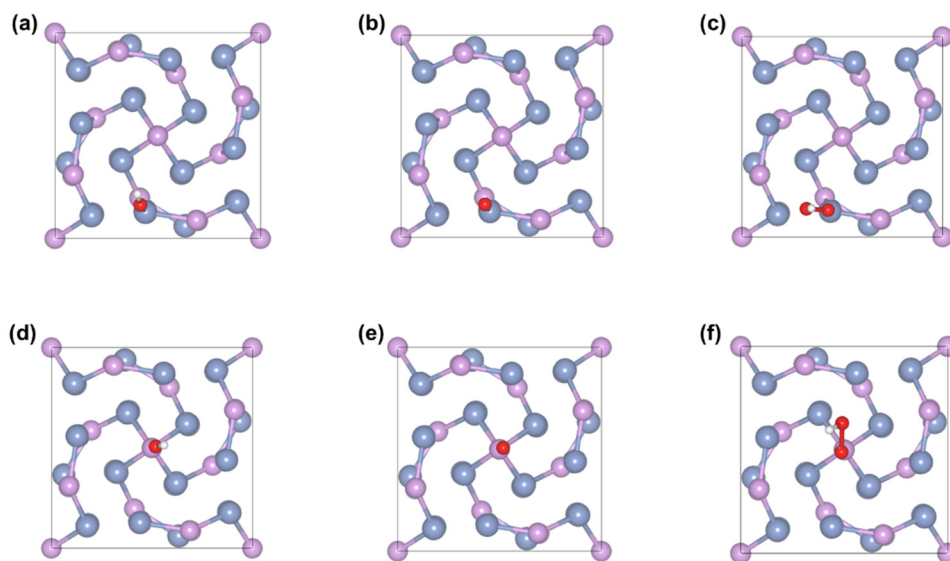**Figure S8.** Geometric configuration of (a) Ni\*OH, (b) Ni\*O, (c) Ni\*OOH, (d) P\*OH, (e) P\*O and (f) P\*OOH adsorption on the Ni<sub>12</sub>P<sub>5</sub> (001) surface.



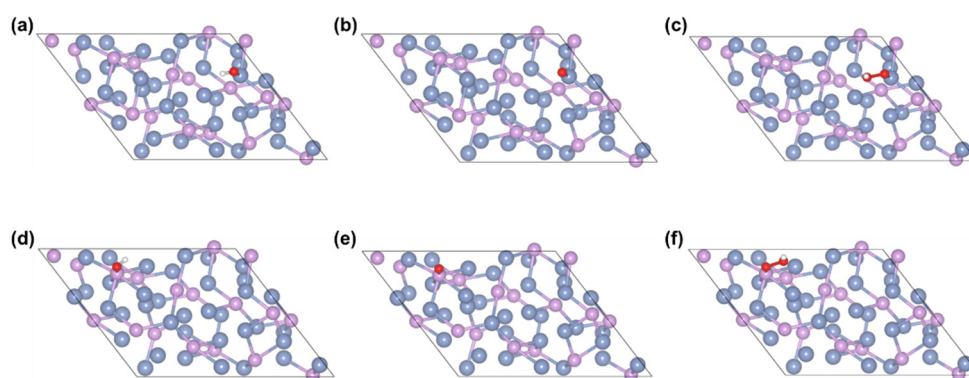

**Figure S9.** Geometric configuration of (a) Ni\*OH, (b) Ni\*O, (c) Ni\*OOH, (d) P\*OH, (e) P\*O and (f) P\*OOH adsorption on the Ni<sub>12</sub>P<sub>5</sub> (111) surface.

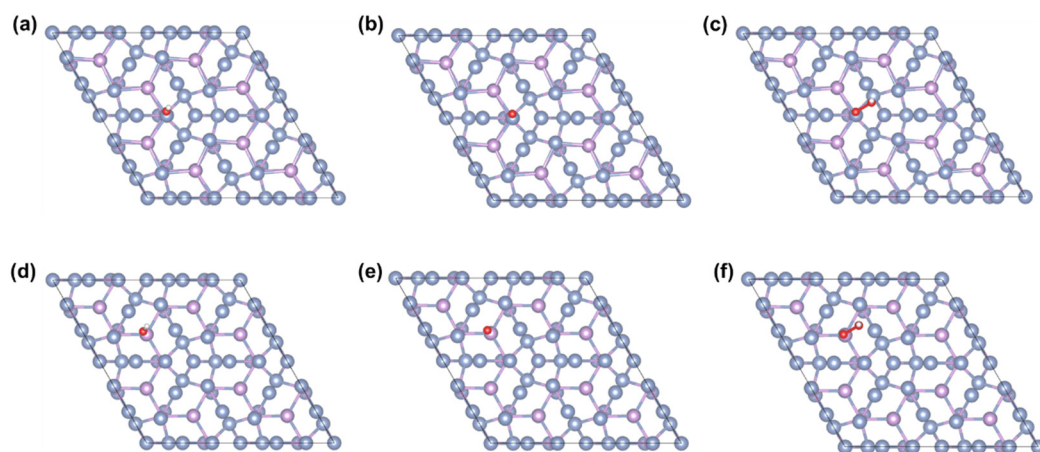

**Figure S10.** Geometric configuration of (a) Ni\*OH, (b) Ni\*O, (c) Ni\*OOH, (d) P\*OH, (e) P\*O and (f) P\*OOH adsorption on the Ni<sub>5</sub>P<sub>2</sub> (001) surface.

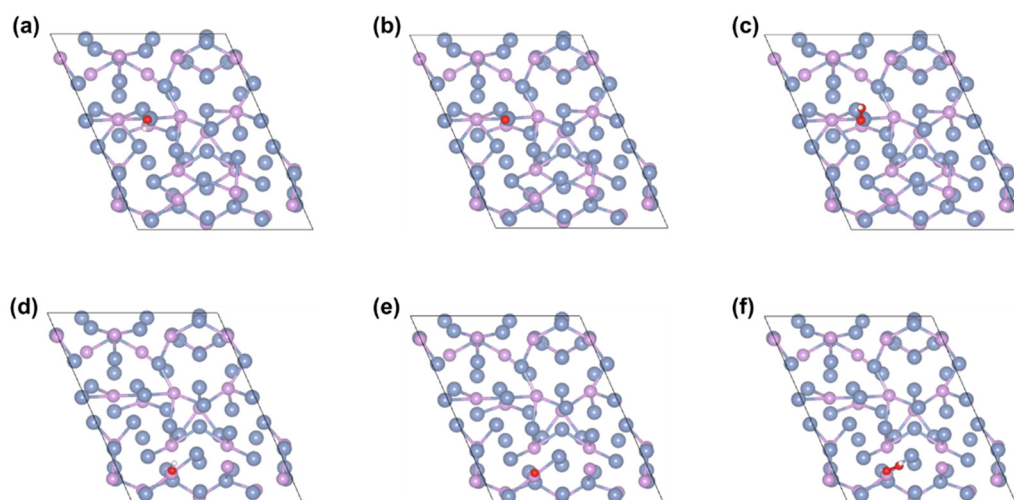

**Figure S11.** Geometric configuration of (a) Ni\*OH, (b) Ni\*O, (c) Ni\*OOH, (d) P\*OH, (e) P\*O and (f) P\*OOH adsorption on the Ni<sub>5</sub>P<sub>2</sub> (111) surface.



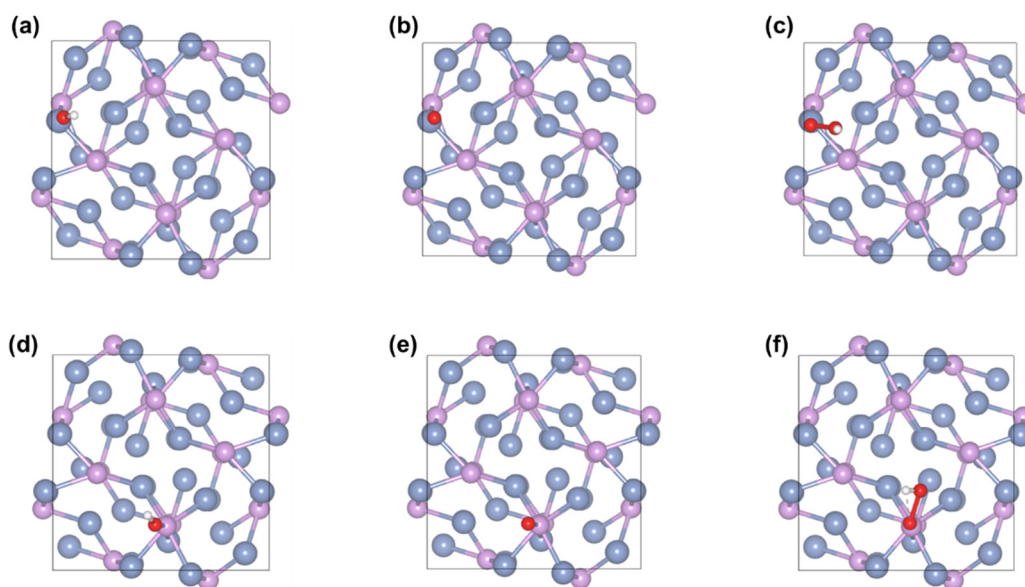

**Figure S12.** Geometric configuration of (a) Ni\*OH, (b) Ni\*O, (c) Ni\*OOH, (d) P\*OH, (e) P\*O and (f) P\*OOH adsorption on the Ni<sub>3</sub>P (001) surface.

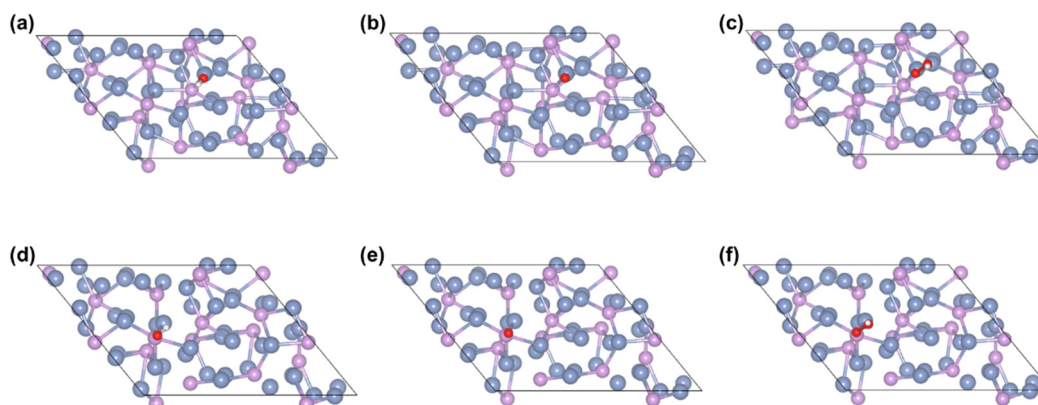

**Figure S13.** Geometric configuration of (a) Ni\*OH, (b) Ni\*O, (c) Ni\*OOH, (d) P\*OH, (e) P\*O and (f) P\*OOH adsorption on the Ni<sub>3</sub>P (111) surface.

**Table S2.** The number of suspended bonds of P and Ni atoms on the exposed surface when establishing different nickel phosphide surfaces.

|                                 | (001) |     | (010) |   | (100) |   | (101) |     | (011) |     | (110) |     | (111) |     |
|---------------------------------|-------|-----|-------|---|-------|---|-------|-----|-------|-----|-------|-----|-------|-----|
|                                 | Ni    | P   | Ni    | P | Ni    | P | Ni    | P   | Ni    | P   | Ni    | P   | Ni    | P   |
| Ni <sub>2</sub> P               | 2,1   | 3   | 1     | 3 | 2,1   | 3 | 2     | 3   | 1     | 3,1 | 2,1   | 4,3 | 1     | 3   |
| Ni <sub>12</sub> P <sub>5</sub> | 0     | 4,1 | 1     | 1 | 1,0   | 2 | 1,0   | 2,1 | 1,0   | 2,1 | 1     | 2   | 1,0   | 2,1 |
| Ni <sub>5</sub> P <sub>2</sub>  | 2     | 3   | 3,2   | 3 | 2,1   | 2 | 2,1   | 2   | 2,1   | 2,1 | 3,2,1 | 3   | 3,2,1 | 3,2 |
| Ni <sub>3</sub> P               | 2,1   | 3   | 2,1   | 3 | 2,1   | 3 | 3,2,1 | 3   | 2,1   | 3   | 2,1   | 3   | 3,1   | 3   |

**Table S3.** Comparison of OER catalytic performance of nickel phosphide in reference.

| Catalyst                        | OER overpotential at 10 mA cm <sup>-2</sup> | Ref.  |
|---------------------------------|---------------------------------------------|-------|
| Ni <sub>12</sub> P <sub>5</sub> | 295mV                                       | [4]   |
| Ni <sub>2</sub> P               | 330mV                                       | [4-6] |
| Ni <sub>3</sub> P               | 296mV                                       | [7]   |
| Ni <sub>5</sub> P <sub>2</sub>  | 300mV                                       | [7]   |
| Ni <sub>5</sub> P <sub>4</sub>  | 312mV                                       | [8]   |

## References:

1. Man, I.C.; Su, H.Y.; Calle-Vallejo, F.; Hansen, H.A.; Martínez, J.I.; Inoglu, N.G.; Kitchin, J.; Jaramillo, T.F.; Nørskov, J.K.; Rossmeisl, J. Universality in Oxygen Evolution Electrocatalysis on Oxide Surfaces. *ChemCatChem* **2011**, *3*, 1159–1165.
2. Rossmeisl, J.; Qu, Z.W.; Zhu, H.; Kroes, G.J.; Nørskov, J.K. Electrolysis of water on oxide surfaces. *Journal of Electroanalytical Chemistry* **2007**, *607*, 83–89.
3. Reuter, K.; Scheffler, M. Composition, structure, and stability of RuO<sub>2</sub>(110) as a function of oxygen pressure. *Physical Review B* **2001**, *65*.
4. Menezes, P.W.; Indra, A.; Das, C.; Walter, C.; Göbel, C.; Gutkin, V.; Schmeißer, D.; Driess, M. Uncovering the Nature of Active Species of Nickel Phosphide Catalysts in High-Performance Electrochemical Overall Water Splitting. *ACS Catalysis* **2016**, *7*, 103–109.
5. Wang, Q.; Zhang, Z.; Cai, C.; Wang, M.; Zhao, Z.L.; Li, M.; Huang, X.; Han, S.; Zhou, H.; Feng, Z.; et al. Single Iridium Atom Doped Ni<sub>2</sub>P Catalyst for Optimal Oxygen Evolution. *J Am Chem Soc* **2021**, *143*, 13605–13615.
6. Stern, L.-A.; Feng, L.; Song, F.; Hu, X. Ni<sub>2</sub>P as a Janus catalyst for water splitting: the oxygen evolution activity of Ni<sub>2</sub>P nanoparticles. *Energy & Environmental Science* **2015**, *8*, 2347–2351.
7. Zhang, P.; Lu, Y.R.; Hsu, C.S.; Xue, H.G.; Chan, T.S.; Suen, N.T.; Chen, H.M. Electronic structure inspired a highly robust electrocatalyst for the oxygen-evolution reaction. *Chem Commun (Camb)* **2020**, *56*, 8071–8074.
8. Lai, C.; Liu, X.; Deng, Y.; Yang, H.; Jiang, H.; Xiao, Z.; Liang, T. Rice-shape nanocrystalline Ni<sub>5</sub>P<sub>4</sub>: A promising bifunctional electrocatalyst for hydrogen evolution reaction and oxygen evolution reaction. *Inorganic Chemistry Communications* **2018**, *97*, 98–102.
